# Supplementary material
Source: PubMed Central journal article supplement (PMC3699822)
Supplement: ASN.2012070642_ASN2012070642SupplementaryData.pdf [file ASN.2012070642_ASN2012070642SupplementaryData.pdf]

**Appendix** Definitions of Life's Simple 7 poor, intermediate, and ideal behaviors and health factors as applied in the REGARDS study.

|                        | Poor Health               | Intermediate Health                               | Ideal Health                                 |
|------------------------|---------------------------|---------------------------------------------------|----------------------------------------------|
| Goal/Metric            | Definition                | Definition                                        | Definition                                   |
| Current smoking        | Yes                       | Former ≤12 months                                 | Never or quit >12 months                     |
| Body Mass Index        | ≥30 kg/m <sup>2</sup>     | 25-29.9 kg/m <sup>2</sup>                         | < 25kg/m <sup>2</sup>                        |
| Physical activity      | None                      | 1 to 3 times per week                             | ≥ 4 times per week                           |
| Healthy diet score     | 0-1 Components            | 2-3 Components                                    | 4-5 Components                               |
| Total cholesterol      | ≥240 mg/dL                | 200-239 mg/dL or treated to goal                  | < 200 mg/dL not on treatment                 |
| Blood pressure         | SBP ≥140 or DBP ≥90 mm Hg | SBP 120-139 or DBP 80-89 mm Hg or treated to goal | SBP < 120 and DBP <80 mm Hg not on treatment |
| Fasting plasma glucose | ≥126 mg/dL                | 100-125 mg/dL or treated to goal                  | <100 mg/dL not on treatment                  |

SBP – systolic blood pressure, DBP – diastolic blood pressure  
 The appendix was adapted from Lloyd-Jones et al. 2010.  
 The levels listed are intended for use by adults ≥ 20 years of age.

Supplemental Table 1. Mean estimated glomerular filtration rate and geometric mean albumin-to-creatinine ratio by level of each Life Simple 7 factor.

| Life Simple 7 Factor | Life Simple 7 Factor Levels                               |                       |                       |
|----------------------|-----------------------------------------------------------|-----------------------|-----------------------|
|                      | Poor                                                      | Intermediate          | Ideal                 |
|                      | Mean (SD) eGFR, ml/min/1.73 m <sup>2</sup>                |                       |                       |
| Cigarette smoking    | 46.1 (11.4)                                               | 46.2 (10.1)           | 47.2 (10.8)           |
| Physical Activity    | 45.8 (11.6)                                               | 45.6 (10.2)           | 48.8 (9.9)            |
| Body mass index      | 46.5 (11.3)                                               | 47.3 (10.8)           | 47.6 (10.3)           |
| Diet                 | 47.5 (10.6)                                               | 49.3 (9.7)            | -                     |
| Blood pressure       | 46.6 (11.8)                                               | 47.2 (10.4)           | 47.8 (10.5)           |
| Cholesterol          | 47.4 (11.4)                                               | 46.8 (10.8)           | 47.4 (10.8)           |
| Glucose              | 45.9 (11.6)                                               | 45.5 (11.6)           | 48.5 (9.9)            |
|                      | Geometric mean (95% CI) albumin-to-creatinine ratio, mg/g |                       |                       |
| Cigarette smoking    | 36.1<br>(28.8 – 45.2)                                     | 21.8<br>(8.1 – 58.6)  | 22.6<br>(21.2 – 24.2) |
| Physical Activity    | 28.8<br>(26.1 – 31.8)                                     | 20.9<br>(18.5 – 23.5) | 19.5<br>(17.2 – 22.0) |
| Body mass index      | 26.6<br>(19.6 – 25.2)                                     | 22.0<br>(19.9 – 24.4) | 22.3<br>(19.6 – 25.2) |
| Diet                 | 20.8<br>(19.1 – 22.6)                                     | 17.8<br>(15.1 – 21.1) | -                     |
| Blood pressure       | 48.6<br>(42.5 – 55.5)                                     | 18.7<br>(17.4 – 20.2) | 11.5<br>(9.8 – 13.5)  |
| Cholesterol          | 26.8<br>(21.3 – 26.8)                                     | 23.2<br>(21.4 – 25.2) | 23.9<br>(21.3 – 26.8) |
| Glucose              | 52.0<br>(43.0 – 62.9)                                     | 32.6<br>(28.9 – 36.8) | 15.4<br>(14.3 – 16.6) |

SD – standard deviation, eGFR – estimated glomerular filtration rate; CI – confidence interval. See Appendix for the definition of Life Simple 7 factor levels.

Supplemental Table 2. Number of end-stage renal disease cases and population at risk by each Life's Simple 7 health factor.

| Life Simple 7 Factors | Life Simple 7 Factor Levels |              |            |
|-----------------------|-----------------------------|--------------|------------|
|                       | Poor                        | Intermediate | Ideal      |
| Cigarette smoking     | 23 / 326                    | 0 / 15       | 137 / 2752 |
| Physical Activity     | 89 / 1423                   | 45 / 947     | 26 / 723   |
| Body mass index       | 81 / 1234                   | 49 / 1131    | 30 / 728   |
| Diet                  | 77 / 1698                   | 13 / 369     | 0 / 1      |
| Blood pressure        | 82 / 888                    | 74 / 1966    | 4 / 239    |
| Cholesterol           | 23 / 317                    | 82 / 1825    | 55 / 951   |
| Glucose               | 39 / 455                    | 82 / 1070    | 39 / 1568  |

Numbers in table are number of cases / number of participants included in the analysis.

Supplemental Table 3. Incidence rates and adjusted hazard ratios for death associated with each Life's Simple 7 factor.

| Life Simple 7 Factor                  | Life Simple 7 Factor Level |                    |                    |
|---------------------------------------|----------------------------|--------------------|--------------------|
|                                       | Poor                       | Intermediate       | Ideal              |
| Mortality Rates (95% CI) <sup>†</sup> |                            |                    |                    |
| Cigarette smoking                     | 81.4 (66.6 – 91.5)         | -                  | 45.6 (41.8 – 49.8) |
| Physical Activity                     | 62.7 (56.4 – 69.7)         | 38.6 (32.8 – 45.3) | 38.0 (31.6 – 45.6) |
| Body mass index                       | 58.1 (50.0 – 67.7)         | 47.3 (41.4 – 54.0) | 45.5 (39.8 – 51.9) |
| Diet                                  | 44.5 (39.8 – 49.8)         | 25.1 (18.2 – 34.6) | -                  |
| Blood pressure                        | 62.1 (54.5 – 70.8)         | 43.3 (38.9 – 48.2) | 47.9 (35.6 – 64.3) |
| Cholesterol                           | 56.3 (49.2 – 64.3)         | 46.5 (41.8 – 51.8) | 42.4 (32.4 – 55.3) |
| Glucose                               | 56.8 (46.7 – 69.0)         | 61.1 (54.0 – 69.1) | 39.2 (34.7 – 44.4) |
| Hazard ratio (95% CI) <sup>‡</sup>    |                            |                    |                    |
| Cigarette smoking                     | 1 (ref)                    | 1.02 (0.37 – 2.79) | 0.46 (0.36 – 0.57) |
| Physical Activity                     | 1 (ref)                    | 0.61 (0.50 – 0.74) | 0.59 (0.48 – 0.73) |
| Body mass index                       | 1 (ref)                    | 0.86 (0.71 – 1.04) | 1.04 (0.84 – 1.29) |
| Diet                                  | 1 (ref)                    | 0.59 (0.42 – 0.83) | -                  |
| Blood pressure                        | 1 (ref)                    | 0.71 (0.60 – 0.85) | 0.85 (0.61 – 1.18) |
| Cholesterol                           | 1 (ref)                    | 0.90 (0.67 – 1.20) | 1.02 (0.75 – 1.38) |
| Glucose                               | 1 (ref)                    | 1.02 (0.80 – 1.28) | 0.67 (0.53 – 0.85) |

CI – confidence interval

- Too few individuals in these groups to produce mortality rates or hazard ratios.

† Mortality rates per 1,000 person-years.

‡ Hazard ratios are adjusted for age, race, sex, geographic region of residence, income, education, history of stroke and coronary heart disease

See appendix for definitions of poor, intermediate and ideal health factor levels.

Supplemental Table 4. Mortality rates and adjusted hazard ratios for all-cause mortality associated with number of ideal Life's Simple 7 factors.

| Number of ideal factors | Percent of participants | N (%) deaths | Mortality rate (95% CI) per 1,000 person years | Hazard ratio (95% CI) |
|-------------------------|-------------------------|--------------|------------------------------------------------|-----------------------|
| 0 or 1                  | 27.3%                   | 182 (29.8%)  | 55.4 (47.9 – 64.1)                             | 1 (Ref)               |
| 2                       | 34.3%                   | 218 (35.7%)  | 51.3 (44.8 – 58.6)                             | 0.85 (0.69 – 1.04)    |
| 3                       | 24.8%                   | 140 (23.0%)  | 45.7 (38.7 – 53.9)                             | 0.74 (0.59 – 0.92)    |
| 4                       | 10.9%                   | 56 (9.2%)    | 37.6 (28.9 – 49.0)                             | 0.56 (0.41 – 0.77)    |
| ≥ 5                     | 2.7%                    | 14 (2.3%)    | 43.0 (25.4 – 72.5)                             | 0.70 (0.40 – 1.22)    |

CI – confidence interval; HR – hazard ratio

Hazard ratios are adjusted for age, race, sex, geographic region of residence, income, education, history of stroke and coronary heart disease.

See appendix for definitions of ideal levels for each Life Simple 7 health factors.

Supplemental Table 5. Adjusted hazard ratios for all-cause mortality associated with number of ideal Life's Simple 7 factors.

| Number of ideal Life's Simple 7 factors | Hazard ratio (95% CI)  |                      |                         |                                  |
|-----------------------------------------|------------------------|----------------------|-------------------------|----------------------------------|
|                                         | Multivariable adjusted | Multivariable + eGFR | Multivariable + log ACR | Multivariable + eGFR and log ACR |
| 0 or 1                                  | 1 (Ref)                | 1 (Ref)              | 1 (Ref)                 | 1 (Ref)                          |
| 2                                       | 0.85 (0.69 – 1.04)     | 0.89 (0.72 – 1.09)   | 0.98 (0.79 – 1.22)      | 0.99 (0.80 – 1.23)               |
| 3                                       | 0.74 (0.59 – 0.92)     | 0.80 (0.63 – 1.00)   | 0.91 (0.72 – 1.16)      | 0.93 (0.73 – 1.18)               |
| 4                                       | 0.56 (0.41 – 0.77)     | 0.61 (0.45 – 0.84)   | 0.71 (0.51 – 0.98)      | 0.71 (0.51 – 0.99)               |
| ≥ 5                                     | 0.70 (0.40 – 1.22)     | 0.82 (0.47 – 1.43)   | 0.87 (0.48 – 1.59)      | 0.92 (0.50 – 1.67)               |

CI – confidence interval; eGFR – estimated glomerular filtration rate; ACR – albumin-to-creatinine ratio.

Multivariable adjusted includes age, race, sex, geographic region of residence, income, education, and history of stroke and coronary heart disease.

See appendix for definitions of ideal levels for each Life Simple 7 factor.
